# Supplementary material
Source: MDPI journal article supplement (https://www.mdpi.com/2073-4441/16/4/514)
Supplement: s1 [file s1]

**Table S1.** Irrigation systems, corresponding to 5 farms, that present annual and permanent crops, and fertilizers applied during the irrigation campaigns of 2018-2019-2020 (Data sourced EDIA [21] and from farmers).

| Irrigation Systems (hydrants) | Predominant Soil Type <sup>a</sup>       | Crops (area)                                                        | Fertilizers                                                                                                                                                                                                                                                       |                                                                                                                                                                                                                                                                              |                                                                                                                                                                                                                                                                                                      |
|-------------------------------|------------------------------------------|---------------------------------------------------------------------|-------------------------------------------------------------------------------------------------------------------------------------------------------------------------------------------------------------------------------------------------------------------|------------------------------------------------------------------------------------------------------------------------------------------------------------------------------------------------------------------------------------------------------------------------------|------------------------------------------------------------------------------------------------------------------------------------------------------------------------------------------------------------------------------------------------------------------------------------------------------|
|                               |                                          |                                                                     | 2018                                                                                                                                                                                                                                                              | 2019                                                                                                                                                                                                                                                                         | 2020                                                                                                                                                                                                                                                                                                 |
| <b>H5-A</b>                   | Calcaric Cambisols;<br>Chromic Vertisols | Vineyard (9 ha)                                                     | <b>Application data: Dc_17, Mr, Ap, M, Jn, Jl</b><br>N (kg N ha <sup>-1</sup> ): 96<br>P (kg P <sub>2</sub> O <sub>5</sub> ha <sup>-1</sup> ): 102<br>K (kg K <sub>2</sub> O ha <sup>-1</sup> ):180<br><b>Other Type</b> (kg ha <sup>-1</sup> ): Fe: 7.5; CaO: 53 | <b>Application data: Fb, Mr, Jn, Jl, Sp</b><br>N (kg ha <sup>-1</sup> ): 85<br>P (kg P <sub>2</sub> O <sub>5</sub> ha <sup>-1</sup> ): 62<br>K (kg K <sub>2</sub> O ha <sup>-1</sup> ): 59<br><b>Other Type</b> (kg ha <sup>-1</sup> ): Fe: 8; CaO: 53; B: 0.012; Mn: 0.062. | <b>Application data: Mr, Ap, Jn, Jl, Sp</b><br>N (kg ha <sup>-1</sup> ): 88<br>P (kg P <sub>2</sub> O <sub>5</sub> ha <sup>-1</sup> ): 25<br>K (kg K <sub>2</sub> O ha <sup>-1</sup> ): 32<br><b>Other Type</b> (kg ha <sup>-1</sup> ): MgO: 0.04; S: 0.04; Fe: 0.01; Mn: 0.01; Zn: 0.01; CaO: 0.07. |
| <b>H6-A</b>                   | Chromic Vertisols;<br>Calcaric Cambisols | Maize (2018)/<br>Sunflower (2019)/ Maize (2020) (10 ha)             | <b>Application data: Jl, Ag, Sp</b><br>N (kg ha <sup>-1</sup> ): 202<br>P (kg P <sub>2</sub> O <sub>5</sub> ha <sup>-1</sup> ): 144<br>K (kg K <sub>2</sub> O ha <sup>-1</sup> ): 216<br><b>Other Type</b> (kg ha <sup>-1</sup> ): S: 27                          | <b>Application data: M, Jl</b><br>N (kg ha <sup>-1</sup> ): 82<br>P (kg P <sub>2</sub> O <sub>5</sub> ha <sup>-1</sup> ): 19<br>K (kg K <sub>2</sub> O ha <sup>-1</sup> ): 20<br><b>Other Type</b> (kg ha <sup>-1</sup> ): S: 8                                              | <b>Application data: Jl, Ag, Sp</b><br>N (kg ha <sup>-1</sup> ): 82<br>P (kg P <sub>2</sub> O <sub>5</sub> ha <sup>-1</sup> ): 59<br>K (kg K <sub>2</sub> O ha <sup>-1</sup> ): 122<br><b>Other Type</b> (kg ha <sup>-1</sup> ): S: 6; Zn: 3                                                         |
| <b>H7-B</b>                   | Pellic Vertisols;<br>Calcaric Cambisols  | Sunflower (15 ha: 2018) /<br>Clover (15 ha: 2019)/ Onion (7 ha:2020 | <b>Application data: Ap, M, Jl</b><br>N (kg ha <sup>-1</sup> ): 110<br>P (kg P <sub>2</sub> O <sub>5</sub> ha <sup>-1</sup> ): 40<br>K (kg K <sub>2</sub> O ha <sup>-1</sup> ): 12<br><b>Other Type</b> (kg ha <sup>-1</sup> ): S: 17                             | <b>Application data: Mr, M</b><br>N (kg ha <sup>-1</sup> ): 0.15<br>P (kg P <sub>2</sub> O <sub>5</sub> ha <sup>-1</sup> ): 87.8<br>K (kg K <sub>2</sub> O ha <sup>-1</sup> ): 0.00063<br><b>Other Type</b> (kg ha <sup>-1</sup> ): S: 0.22; Mg: 0.12; B: 0.19               | <b>Application data: Mr, Ap</b><br>N (kg ha <sup>-1</sup> ): 113<br>P (kg P <sub>2</sub> O <sub>5</sub> ha <sup>-1</sup> ): 0.73<br>K (kg K <sub>2</sub> O ha <sup>-1</sup> ): 0.07<br><b>Other Type</b> (kg ha <sup>-1</sup> ): Zn: 1.7; Mn: 0.86; MgO: 0.09; S: 210; CaO: 65.                      |
| <b>H21-A</b>                  | Chromic Vertisols;<br>Pellic Vertisols   | Olive Grove (9 ha)                                                  | <b>Application data: Fb, Mr</b><br>N (kg ha <sup>-1</sup> ): 84<br>P (kg P <sub>2</sub> O <sub>5</sub> ha <sup>-1</sup> ): 84<br>K (kg K <sub>2</sub> O ha <sup>-1</sup> ): 92<br><b>Other Type</b> (kg ha <sup>-1</sup> ): B: 0.3                                | Without application of fertilizers                                                                                                                                                                                                                                           | <b>Application data: Mr, Ap, M, Jl, Ag, Sp</b><br>N (kg ha <sup>-1</sup> ): 127<br>P (kg P <sub>2</sub> O <sub>5</sub> ha <sup>-1</sup> ): 58<br>K (kg K <sub>2</sub> O ha <sup>-1</sup> ): 145<br><b>Other Type</b> (kg ha <sup>-1</sup> ): Zn: 0.17; MgO: 0.17. B: 0.35; S: 33                     |

|       |                                          |                                           |                                                                                                                                                                                                                                            |                                                                                                                                                                                                                                        |                                                                                                                                                                            |
|-------|------------------------------------------|-------------------------------------------|--------------------------------------------------------------------------------------------------------------------------------------------------------------------------------------------------------------------------------------------|----------------------------------------------------------------------------------------------------------------------------------------------------------------------------------------------------------------------------------------|----------------------------------------------------------------------------------------------------------------------------------------------------------------------------|
| H23-A | Calcaric Cambisols;<br>Chromic Vertisols | Sunflower (2018)/ Maize (2019)<br>(14 ha) | <b>Application data: Ap, M, Jn</b><br>N (kg ha <sup>-1</sup> ): 127<br>P (kg P <sub>2</sub> O <sub>5</sub> ha <sup>-1</sup> ): 34<br>K (kg K <sub>2</sub> O ha <sup>-1</sup> ):<br><b>Other Type</b> (kg ha <sup>-1</sup> ): B: 0.2; S: 16 | <b>Application data: Jn, Jl, Ag</b><br>N (kg ha <sup>-1</sup> ): 254                                                                                                                                                                   | Without plantation                                                                                                                                                         |
|       | Chromic Vertisols                        | Vineyard (4.5 ha)                         | <b>Application data: Mr, Ap, Jl, Oc</b><br>N (kg ha <sup>-1</sup> ): 51<br>P (kg P <sub>2</sub> O <sub>5</sub> ha <sup>-1</sup> ): 50<br>K (kg K <sub>2</sub> O ha <sup>-1</sup> ): 56                                                     | <b>Application data: Fb, M, Jn</b><br>N (kg ha <sup>-1</sup> ): 58<br>P (kg P <sub>2</sub> O <sub>5</sub> ha <sup>-1</sup> ): 72<br>K (kg K <sub>2</sub> O ha <sup>-1</sup> ): 101<br><b>Other Type</b> (kg ha <sup>-1</sup> ): B: 0.4 | <b>Application data: Fb</b><br>N (kg ha <sup>-1</sup> ): 34<br>P (kg P <sub>2</sub> O <sub>5</sub> ha <sup>-1</sup> ): 61<br>K (kg K <sub>2</sub> O ha <sup>-1</sup> ): 50 |

<sup>a</sup> information about soil classification adapted from Tomaz *et al.* [22];

Application data: Fb – February; Mr – March; Ap – April; M – May; Jn – June; Jl – July; Ag – August; Sp – September; Oc – October; Dc – December.

**Table S2.** FAO guidelines for interpretation of water quality for irrigation (adapted from Ayers and Westcot [18]).

| Potential irrigation problem                      | Degree of restriction on use |                    |        |
|---------------------------------------------------|------------------------------|--------------------|--------|
|                                                   | None                         | Slight to moderate | Severe |
| Salinity <sup>1)</sup>                            |                              |                    |        |
| EC (dS m <sup>-1</sup> )                          | < 0.7                        | 0.7 – 3.0          | > 3.0  |
| Infiltration <sup>2)</sup>                        |                              |                    |        |
| SAR 0 – 3 and EC (dS m <sup>-1</sup> )            | > 0.7                        | 0.7 – 0.2          | < 0.2  |
| SAR 3 – 6 and EC (dS m <sup>-1</sup> )            | > 1.2                        | 1.2 – 0.3          | < 0.3  |
| SAR 6 – 12 and EC (dS m <sup>-1</sup> )           | > 1.9                        | 1.9 – 0.5          | < 0.5  |
| SAR 12 – 20 and EC (dS m <sup>-1</sup> )          | > 2.9                        | 2.9 – 1.3          | < 1.3  |
| SAR 20 – 40 and EC (dS m <sup>-1</sup> )          | > 5.0                        | 5.0 – 2.9          | < 2.9  |
| Specific ion toxicity <sup>3)</sup>               |                              |                    |        |
| Sodium                                            |                              |                    |        |
| Surface irrigation (SAR)                          | < 3                          | 3 – 9              | > 9    |
| Sprinkler irrigation ([Na]; mg L <sup>-1</sup> )  | < 69                         | > 69               |        |
| Chloride ([Cl]; mg L <sup>-1</sup> )              |                              |                    |        |
| Surface irrigation                                | < 142                        | 143 – 355          | > 355  |
| Sprinkler irrigation                              | < 106                        | > 106              |        |
| Boron ([B]; mg L <sup>-1</sup> )                  | < 0.7                        | 0.7 – 3.0          | > 3.0  |
| Miscellaneous effects <sup>4)</sup>               |                              |                    |        |
| Nitrate ([NO <sub>3</sub> ]; mg L <sup>-1</sup> ) | < 5                          | 5 – 30             | > 30   |
| pH                                                | Normal range: 6.5 – 8.4      |                    |        |

- 1) Affects crop water availability; 2) Affects infiltration rate of water into the soil; 3) Affects sensitive crops; 4) Affects susceptible crops. EC – Electric conductivity; SAR – Sodium Adsorption ratio; Na – Sodium.

**Table S3.** Spearman correlation coefficients between the climate conditions and water physico-chemical parameters in the Lage reservoir: significant at  $p<0.05$ .

|                                        | P             | Trans         | T             | pH     | EC            | DO     | BOD <sub>5</sub> | TP           | TN            | NH <sub>4</sub> | NO <sub>3</sub> | NO <sub>2</sub> | TSS          | B            | Ca            | Mg            | Na     | K            | Cl            | Fe           | Mn    |
|----------------------------------------|---------------|---------------|---------------|--------|---------------|--------|------------------|--------------|---------------|-----------------|-----------------|-----------------|--------------|--------------|---------------|---------------|--------|--------------|---------------|--------------|-------|
| Trans (m)                              | 0.228         |               |               |        |               |        |                  |              |               |                 |                 |                 |              |              |               |               |        |              |               |              |       |
| T (°C)                                 | <b>-0.528</b> | -0.123        |               |        |               |        |                  |              |               |                 |                 |                 |              |              |               |               |        |              |               |              |       |
| pH                                     | -0.063        | 0.062         | 0.250         |        |               |        |                  |              |               |                 |                 |                 |              |              |               |               |        |              |               |              |       |
| EC (µS cm <sup>-1</sup> )              | 0.354         | <b>0.537</b>  | -0.049        | -0.202 |               |        |                  |              |               |                 |                 |                 |              |              |               |               |        |              |               |              |       |
| DO (%)                                 | <b>0.486</b>  | -0.095        | <b>-0.500</b> | -0.044 | 0.016         |        |                  |              |               |                 |                 |                 |              |              |               |               |        |              |               |              |       |
| BOD <sub>5</sub> (mg L <sup>-1</sup> ) | -0.263        | -0.304        | 0.321         | 0.082  | -0.027        | 0.061  |                  |              |               |                 |                 |                 |              |              |               |               |        |              |               |              |       |
| TP (mg L <sup>-1</sup> )               | -0.198        | -0.077        | <b>0.587</b>  | 0.040  | 0.121         | -0.164 | 0.234            |              |               |                 |                 |                 |              |              |               |               |        |              |               |              |       |
| TN (mg L <sup>-1</sup> )               | -0.412        | -0.058        | 0.302         | 0.025  | 0.100         | -0.121 | -0.145           | <b>0.565</b> |               |                 |                 |                 |              |              |               |               |        |              |               |              |       |
| NH <sub>4</sub> (mg L <sup>-1</sup> )  | 0.058         | 0.204         | -0.192        | 0.292  | 0.116         | -0.262 | <b>-0.562</b>    | -0.161       | 0.107         |                 |                 |                 |              |              |               |               |        |              |               |              |       |
| NO <sub>3</sub> (mg L <sup>-1</sup> )  | 0.263         | -0.184        | -0.139        | -0.043 | 0.325         | 0.142  | -0.150           | 0.026        | 0.230         | 0.376           |                 |                 |              |              |               |               |        |              |               |              |       |
| NO <sub>2</sub> (mg L <sup>-1</sup> )  | 0.380         | 0.301         | <b>-0.460</b> | -0.362 | 0.312         | -0.009 | <b>-0.596</b>    | -0.193       | 0.029         | 0.352           | 0.363           |                 |              |              |               |               |        |              |               |              |       |
| TSS (mg L <sup>-1</sup> )              | -0.374        | -0.389        | -0.185        | -0.128 | -0.346        | -0.184 | 0.171            | 0.042        | 0.272         | -0.083          | 0.067           | -0.050          |              |              |               |               |        |              |               |              |       |
| B (mg L <sup>-1</sup> )                | 0.111         | 0.179         | 0.192         | -0.157 | <b>0.631</b>  | -0.172 | 0.030            | 0.270        | 0.194         | 0.307           | <b>0.501</b>    | 0.190           | -0.264       |              |               |               |        |              |               |              |       |
| Ca (mg L <sup>-1</sup> )               | 0.263         | 0.058         | 0.024         | 0.052  | 0.381         | -0.160 | <b>-0.416</b>    | -0.141       | 0.074         | <b>0.437</b>    | <b>0.557</b>    | 0.178           | -0.280       | <b>0.516</b> |               |               |        |              |               |              |       |
| Mg (mg L <sup>-1</sup> )               | 0.214         | <b>0.491</b>  | -0.085        | -0.098 | <b>0.622</b>  | -0.087 | <b>-0.601</b>    | 0.201        | <b>0.429</b>  | <b>0.628</b>    | <b>0.480</b>    | <b>0.552</b>    | -0.238       | <b>0.621</b> | <b>0.483</b>  |               |        |              |               |              |       |
| Na (mg L <sup>-1</sup> )               | 0.357         | -0.093        | -0.198        | -0.083 | 0.293         | 0.221  | -0.117           | -0.376       | -0.147        | 0.347           | <b>0.538</b>    | 0.015           | -0.219       | <b>0.443</b> | <b>0.618</b>  | 0.327         |        |              |               |              |       |
| K (mg L <sup>-1</sup> )                | -0.377        | -0.133        | 0.120         | 0.015  | 0.258         | -0.272 | 0.069            | 0.370        | <b>0.669</b>  | 0.254           | <b>0.433</b>    | 0.138           | <b>0.447</b> | 0.277        | 0.127         | 0.342         | -0.111 |              |               |              |       |
| Cl (mg L <sup>-1</sup> )               | 0.226         | 0.399         | -0.351        | 0.211  | <b>0.475</b>  | -0.162 | <b>-0.447</b>    | -0.145       | 0.095         | <b>0.711</b>    | <b>0.463</b>    | 0.356           | 0.010        | 0.237        | <b>0.510</b>  | <b>0.605</b>  | 0.226  | <b>0.449</b> |               |              |       |
| Fe (mg L <sup>-1</sup> )               | -0.192        | -0.331        | 0.089         | 0.001  | -0.034        | 0.007  | <b>0.699</b>     | -0.073       | -0.384        | -0.402          | -0.234          | -0.311          | 0.106        | -0.018       | <b>-0.420</b> | <b>-0.546</b> | -0.155 | -0.137       | -0.344        |              |       |
| Mn (mg L <sup>-1</sup> )               | -0.045        | <b>-0.433</b> | 0.252         | 0.097  | -0.075        | 0.183  | <b>0.634</b>     | <b>0.489</b> | -0.087        | -0.264          | 0.021           | <b>-0.560</b>   | 0.016        | 0.250        | -0.194        | -0.288        | -0.046 | -0.044       | -0.298        | <b>0.540</b> |       |
| SAR                                    | -0.116        | <b>-0.461</b> | -0.099        | -0.037 | <b>-0.463</b> | 0.283  | <b>0.699</b>     | -0.340       | <b>-0.497</b> | <b>-0.545</b>   | -0.310          | <b>-0.513</b>   | 0.218        | -0.390       | <b>-0.481</b> | <b>-0.855</b> | 0.040  | -0.388       | <b>-0.602</b> | <b>0.644</b> | 0.366 |

**Table S4.** Physico-chemical parameters analysed during the study (average value  $\pm$  standard error; n=3)

| Location | Year | Month | T<br>(°C) | Transp<br>(m) | DO<br>(% O <sub>2</sub> ) | pH              | EC<br>( $\mu$ S cm <sup>-1</sup> ) | TSS<br>(mg L <sup>-1</sup> ) | BOD <sub>5</sub><br>(mg O <sub>2</sub> L <sup>-1</sup> ) | TP<br>(mg P L <sup>-1</sup> ) | TN<br>(mg N L <sup>-1</sup> ) | NH <sub>4</sub><br>(mg NH <sub>4</sub> L <sup>-1</sup> ) | NO <sub>3</sub><br>(mg NO <sub>3</sub> L <sup>-1</sup> ) | NO <sub>2</sub><br>(mg NO <sub>2</sub> L <sup>-1</sup> ) | Fe<br>(mg Fe L <sup>-1</sup> ) | Mn<br>(mg Mn L <sup>-1</sup> ) |
|----------|------|-------|-----------|---------------|---------------------------|-----------------|------------------------------------|------------------------------|----------------------------------------------------------|-------------------------------|-------------------------------|----------------------------------------------------------|----------------------------------------------------------|----------------------------------------------------------|--------------------------------|--------------------------------|
| L        | 2018 | Ap    | 21.00     | 3.90          | 93.10                     | 8.18 $\pm$ 0.02 | 610.50 $\pm$ 17.68                 | 11.00 $\pm$ 0.24             | 2.00 $\pm$ 0.00                                          | 0.05 $\pm$ 0.004              | 1.36 $\pm$ 0.10               | < DL                                                     | < DL                                                     | < DL                                                     | < DL                           | 0.01 $\pm$ 0.0007              |
|          |      | Jl    | 24.50     | 1.25          | 120.50                    | 8.24 $\pm$ 0.62 | 604.50 $\pm$ 10.94                 | 64.00 $\pm$ 2.83             | 7.50 $\pm$ 0.71                                          | 0.05 $\pm$ 0.002              | 2.18 $\pm$ 0.01               | < DL                                                     | 0.86 $\pm$ 0.02                                          | < DL                                                     | 0.25 $\pm$ 0.04                | 0.02 $\pm$ 0.002               |
|          |      | Sp    | 19.50     | 2.20          | 110.90                    | 7.80 $\pm$ 0.00 | 712.00 $\pm$ 2.65                  | 46.00 $\pm$ 2.83             | 9.33 $\pm$ 0.58                                          | 0.04 $\pm$ 0.004              | 1.63 $\pm$ 0.01               | < DL                                                     | 0.87 $\pm$ 0.05                                          | < DL                                                     | 0.36 $\pm$ 0.04                | 0.02 $\pm$ 0.002               |
|          |      | Dc    | 12.20     | 3.00          | 92.10                     | 7.03 $\pm$ 0.05 | 555.33 $\pm$ 1.53                  | 21.00 $\pm$ 1.41             | 4.00 $\pm$ 0.41                                          | 0.01 $\pm$ 0.002              | 1.14 $\pm$ 0.01               | < DL                                                     | < DL                                                     | < DL                                                     | 0.16 $\pm$ 0.01                | 0.01 $\pm$ 0.002               |
|          | 2019 | Ap    | 20.00     | n.d.          | 98.90                     | 8.44 $\pm$ 0.00 | 567.00 $\pm$ 1.41                  | 20.00 $\pm$ 2.00             | 5.50 $\pm$ 0.71                                          | 0.01 $\pm$ 0.00               | 1.16 $\pm$ 0.11               | 0.04 $\pm$ 0.002                                         | 0.88 $\pm$ 0.05                                          | < DL                                                     | 0.10 $\pm$ 0.01                | 0.01 $\pm$ 0.002               |
|          |      | Jl    | 26.00     | 3.50          | 61.30                     | 8.53 $\pm$ 0.01 | 590.33 $\pm$ 0.58                  | 28.00 $\pm$ 2.41             | 4.00 $\pm$ 0.00                                          | 0.04 $\pm$ 0.003              | 1.41 $\pm$ 0.04               | 0.06 $\pm$ 0.0007                                        | < DL                                                     | < DL                                                     | 0.09 $\pm$ 0.006               | 0.01 $\pm$ 0.004               |
|          |      | Sp    | 21.00     | 4.50          | 76.70                     | 8.60 $\pm$ 0.01 | 668.67 $\pm$ 2.52                  | 33.00 $\pm$ 1.41             | 6.00 $\pm$ 0.00                                          | 0.03 $\pm$ 0.00               | 1.37 $\pm$ 0.03               | 0.10 $\pm$ 0.004                                         | 0.76 $\pm$ 0.06                                          | < DL                                                     | 0.16 $\pm$ 0.02                | 0.02 $\pm$ 0.0007              |
|          |      | Dc    | 10.50     | 5.00          | 128.80                    | 8.49 $\pm$ 0.02 | 668.33 $\pm$ 2.31                  | 10.00 $\pm$ 0.00             | 3.50 $\pm$ 0.37                                          | 0.01 $\pm$ 0.002              | 1.34 $\pm$ 0.11               | 0.09 $\pm$ 0.002                                         | 0.71 $\pm$ 0.05                                          | < DL                                                     | 0.12 $\pm$ 0.004               | <DL                            |
|          | 2020 | M     | 24.50     | 4.00          | 97.60                     | 8.56 $\pm$ 0.01 | 759.00 $\pm$ 2.00                  | 4.00 $\pm$ 0.00              | 8.00 $\pm$ 0.00                                          | 0.07 $\pm$ 0.002              | 1.29 $\pm$ 0.12               | < DL                                                     | 0.95 $\pm$ 0.03                                          | < DL                                                     | 0.25 $\pm$ 0.02                | 0.02 $\pm$ 0.001               |
|          |      | Jl    | 25.50     | 3.50          | 91.10                     | 8.30 $\pm$ 0.01 | 634.67 $\pm$ 0.58                  | 6.00 $\pm$ 0.00              | 7.00 $\pm$ 0.00                                          | 0.06 $\pm$ 0.003              | 1.71 $\pm$ 0.03               | < DL                                                     | < DL                                                     | < DL                                                     | 0.14 $\pm$ 0.02                | 0.01 $\pm$ 0.001               |
|          |      | Sp    | 22.00     | 2.50          | 97.70                     | 7.95 $\pm$ 0.05 | 64.67 $\pm$ 0.58                   | 32.00 $\pm$ 2.83             | 4.00 $\pm$ 0.00                                          | 0.13 $\pm$ 0.002              | 1.86 $\pm$ 0.01               | < DL                                                     | 1.71 $\pm$ 0.04                                          | < DL                                                     | < DL                           | 0.03 $\pm$ 0.002               |
|          |      | Dc    | 12.00     | 3.50          | 84.80                     | 7.86 $\pm$ 0.01 | 678.33 $\pm$ 0.58                  | 25.00 $\pm$ 1.41             | < DL                                                     | 0.04 $\pm$ 0.0004             | 1.36 $\pm$ 0.06               | 0.08 $\pm$ 0.002                                         | 1.38 $\pm$ 0.16                                          | < DL                                                     | 0.07 $\pm$ 0.01                | <DL                            |
| LS       | 2018 | Jl    | 25.00     | 1.20          | 73.93                     | 8.65 $\pm$ 0.01 | 541.50 $\pm$ 3.54                  | 94.00 $\pm$ 5.66             | 7.50 $\pm$ 0.71                                          | 0.05 $\pm$ 0.003              | 1.98 $\pm$ 0.003              | 0.02 $\pm$ 0.001                                         | 0.85 $\pm$ 0.05                                          | < DL                                                     | 0.34 $\pm$ 0.01                | 0.02 $\pm$ 0.00                |
|          |      | Sp    | 20.00     | 2.00          | 89.24                     | 8.21 $\pm$ 0.00 | 495.20 $\pm$ 0.27                  | 48.00 $\pm$ 0.00             | 10.00 $\pm$ 0.00                                         | 0.04 $\pm$ 0.004              | 1.20 $\pm$ 0.02               | 0.03 $\pm$ 0.001                                         | 0.88 $\pm$ 0.03                                          | < DL                                                     | 0.26 $\pm$ 0.01                | 0.03 $\pm$ 0.003               |
|          |      | Dc    | 12.00     | 1.50          | 113.30                    | 8.32 $\pm$ 0.00 | 524.60 $\pm$ 0.58                  | 26.00 $\pm$ 0.00             | 6.50 $\pm$ 0.71                                          | 0.01 $\pm$ 0.00               | 1.22 $\pm$ 0.01               | < DL                                                     | < DL                                                     | < DL                                                     | 0.72 $\pm$ 0.02                | 0.03 $\pm$ 0.00                |
|          | 2019 | Ap    | 21.50     | n.d.          | 88.88                     | 8.39 $\pm$ 0.01 | 576.50 $\pm$ 10.61                 | 30.0 $\pm$ 0.00              | 5.00 $\pm$ 0.00                                          | <DL                           | 0.96 $\pm$ 0.05               | 0.04 $\pm$ 0.001                                         | 0.92 $\pm$ 0.06                                          | < DL                                                     | 0.26 $\pm$ 0.02                | 0.02 $\pm$ 0.001               |
|          |      | Jl    | 28.00     | 2.50          | 66.58                     | 8.40 $\pm$ 0.01 | 593.67 $\pm$ 0.58                  | 8.00 $\pm$ 0.66              | 3.50 $\pm$ 0.37                                          | 0.05 $\pm$ 0.003              | 1.51 $\pm$ 0.06               | 0.06 $\pm$ 0.002                                         | < DL                                                     | < DL                                                     | 0.21 $\pm$ 0.03                | 0.02 $\pm$ 0.002               |
|          |      | Sp    | 22.30     | 3.50          | 76.74                     | 8.31 $\pm$ 0.01 | 683.33 $\pm$ 1.53                  | 21.00 $\pm$ 2.17             | 6.50 $\pm$ 0.71                                          | 0.04 $\pm$ 0.003              | 1.31 $\pm$ 0.03               | 0.17 $\pm$ 0.004                                         | 0.75 $\pm$ 0.03                                          | < DL                                                     | 0.17 $\pm$ 0.02                | 0.02 $\pm$ 0.002               |
|          |      | Dc    | 10.90     | 3.50          | 139.64                    | 8.36 $\pm$ 0.01 | 672.00 $\pm$ 1.73                  | 6.00 $\pm$ 0.00              | 4.00 $\pm$ 0.00                                          | 0.01 $\pm$ 0.00               | 1.04 $\pm$ 0.07               | 0.11 $\pm$ 0.0009                                        | 1.04 $\pm$ 0.18                                          | 0.07 $\pm$ 0.0001                                        | 0.31 $\pm$ 0.03                | 0.02 $\pm$ 0.001               |
|          | 2020 | M     | 25.10     | 3.00          | 79.35                     | 8.10 $\pm$ 0.01 | 762.00 $\pm$ 2.65                  | 6.00 $\pm$ 0.00              | 8.50 $\pm$ 0.71                                          | 0.12 $\pm$ 0.01               | 1.05 $\pm$ 0.06               | < DL                                                     | < DL                                                     | < DL                                                     | 0.95 $\pm$ 0.01                | 0.05 $\pm$ 0.005               |
|          |      | Jl    | 26.40     | 2.50          | 81.98                     | 8.11 $\pm$ 0.01 | 643.00 $\pm$ 0.00                  | 8.00 $\pm$ 0.00              | 7.00 $\pm$ 0.71                                          | 0.06 $\pm$ 0.002              | 1.32 $\pm$ 0.04               | < DL                                                     | 0.94 $\pm$ 0.07                                          | < DL                                                     | 0.32 $\pm$ 0.02                | 0.02 $\pm$ 0.001               |
|          |      | Sp    | 23.00     | 1.80          | 116.08                    | 8.48 $\pm$ 0.01 | 664.00 $\pm$ 0.00                  | 4.00 $\pm$ 0.00              | 4.00 $\pm$ 0.00                                          | 0.14 $\pm$ 0.0007             | 2.44 $\pm$ 0.05               | 0.11 $\pm$ 0.003                                         | 2.32 $\pm$ 0.05                                          | < DL                                                     | 0.06 $\pm$ 0.002               | 0.03 $\pm$ 0.0005              |
|          |      | Dc    | 12.50     | 2.60          | 67.58                     | 7.73 $\pm$ 0.01 | 697.67 $\pm$ 0.00                  | 32.00 $\pm$ 0.00             | 2.00 $\pm$ 0.00                                          | 0.05 $\pm$ 0.002              | 2.30 $\pm$ 0.07               | 0.29 $\pm$ 0.002                                         | 5.00 $\pm$ 0.27                                          | 0.09 $\pm$ 0.0002                                        | 0.11 $\pm$ 0.001               | <DL                            |

Detection limit (DL): TP: 0.0075 mg P L<sup>-1</sup>; TN: 0.169 mg N L<sup>-1</sup>; NH<sub>4</sub>: 0.013 mg NH<sub>4</sub><sup>+</sup> L<sup>-1</sup>; NO<sub>3</sub>: 0.667 mg NO<sub>3</sub> L<sup>-1</sup>; NO<sub>2</sub>: 0.017 mg NO<sub>2</sub> L<sup>-1</sup>; BOD<sub>5</sub>: 1.667 mg O<sub>2</sub> L<sup>-1</sup>; Fe: 0.033 mg Fe L<sup>-1</sup>; Mn: 0.008 mg Mn L<sup>-1</sup>.

**Table S5.** Loadings of 22 physico-chemical parameters represented on the seven principal components (PC) for surface samples from Lage reservoir. Bold values correspond to the higher factor loadings (>0.70) of the variables in each PC [28].

|                                        | Factor 1      | Factor 2      | Factor 3 | Factor 4 | Factor 5 | Factor 6 | Factor 7 |
|----------------------------------------|---------------|---------------|----------|----------|----------|----------|----------|
| Precipitation (mm)                     | 0.326         | <b>-0.728</b> | 0.131    | -0.181   | -0.341   | 0.198    | 0.140    |
| Transp (m)                             | 0.283         | 0.395         | -0.057   | -0.693   | -0.109   | -0.329   | 0.157    |
| T (°C)                                 | -0.344        | <b>0.764</b>  | 0.334    | 0.151    | 0.359    | 0.094    | -0.228   |
| pH                                     | -0.099        | 0.268         | 0.408    | 0.222    | 0.343    | 0.290    | 0.612    |
| EC (µS cm <sup>-1</sup> )              | 0.533         | 0.114         | 0.546    | -0.354   | -0.212   | -0.212   | -0.162   |
| OD (%)                                 | -0.156        | -0.374        | 0.183    | -0.288   | -0.559   | 0.487    | 0.156    |
| BOD <sub>5</sub> (mg L <sup>-1</sup> ) | <b>-0.763</b> | 0.210         | 0.437    | 0.187    | -0.264   | -0.163   | 0.063    |
| TP (mg L <sup>-1</sup> )               | 0.046         | <b>0.889</b>  | 0.109    | -0.270   | -0.117   | 0.045    | 0.092    |
| TN (mg L <sup>-1</sup> )               | 0.350         | 0.674         | -0.055   | 0.190    | -0.234   | 0.310    | -0.218   |
| NH <sub>4</sub> (mg L <sup>-1</sup> )  | 0.614         | -0.200        | 0.076    | 0.228    | 0.471    | -0.039   | 0.401    |
| NO <sub>3</sub> (mg L <sup>-1</sup> )  | <b>0.728</b>  | 0.129         | 0.247    | 0.393    | -0.239   | 0.258    | -0.037   |
| NO <sub>2</sub> (mg L <sup>-1</sup> )  | <b>0.771</b>  | -0.221        | -0.308   | -0.086   | -0.153   | -0.103   | 0.076    |
| SST (mg L <sup>-1</sup> )              | -0.136        | 0.156         | -0.552   | 0.629    | -0.327   | -0.046   | 0.021    |
| B (mg L <sup>-1</sup> )                | 0.406         | 0.108         | 0.650    | 0.045    | -0.296   | -0.120   | -0.011   |
| Ca (mg L <sup>-1</sup> )               | 0.552         | -0.303        | 0.452    | 0.186    | 0.332    | -0.185   | -0.261   |
| Mg (mg L <sup>-1</sup> )               | <b>0.892</b>  | 0.223         | 0.234    | -0.055   | 0.032    | 0.124    | 0.019    |
| Na (mg L <sup>-1</sup> )               | 0.245         | -0.558        | 0.599    | 0.318    | 0.009    | 0.076    | -0.256   |
| K (mg L <sup>-1</sup> )                | 0.446         | 0.581         | -0.139   | 0.451    | -0.361   | -0.119   | 0.052    |
| Cl (mg L <sup>-1</sup> )               | <b>0.748</b>  | -0.152        | -0.169   | 0.246    | -0.177   | -0.217   | 0.285    |
| Fe (mg L <sup>-1</sup> )               | -0.444        | -0.098        | 0.331    | 0.268    | -0.263   | -0.632   | 0.177    |
| Mn (mg L <sup>-1</sup> )               | <b>-0.717</b> | 0.144         | 0.523    | -0.046   | -0.098   | 0.071    | 0.212    |
| SAR                                    | <b>-0.857</b> | -0.358        | 0.014    | 0.187    | -0.212   | 0.045    | -0.042   |
| Eigenvalues                            | 6.379         | 3.618         | 2.776    | 2.060    | 1.765    | 1.264    | 1.046    |
| % Total variance                       | 29.00         | 16.44         | 12.61    | 9.36     | 8.02     | 5.75     | 4.75     |
| % Accumulated variance                 | 29.00         | 45.44         | 58.06    | 67.42    | 75.44    | 81.19    | 85.94    |
